# Supplementary material
Source: publisher site journal article supplement (https://www.dovepress.com/get_supplementary_file.php?f=481483.docx)
Supplement: Supplementary file 1 [file get_supplementary_file.php]

Table S1 The associations between ALB, D-Dimer, and AECOPD hospital readmission

| Variables | Outcome/Total | Unadjusted Model | | Adjusted Model | |
| --- | --- | --- | --- | --- | --- |
| OR (95% CI) | *P* | OR (95% CI) | *P* |
| ALB, g/L |  |  |  |  |  |
| ≥38.4 | n=39/230 | Ref |  | Ref |  |
| ＜38.4 | n=78/279 | 1.90 (1.24-2.95) | 0.004 | 1.68 (1.07-2.68) | 0.026 |
| D-Dimer, ng/mL |  |  |  |  |  |
| <83 | n=20/144 | Ref |  | Ref |  |
| ≥83 | n=97/365 | 2.24 (1.35-3.89) | 0.003 | 1.96 (1.13-3.53) | 0.020 |

OR: odds ratio; CI: confidence interval; Ref: reference.

Adjusted Model adjusting age, sex, mMRC, FEV1/FVC, and COPD course.

Table S2 Results of additive interaction analysis

| Group | Measures | Unadjusted Model |  | Adjusted Model |  |
| --- | --- | --- | --- | --- | --- |
| Measure (95% CI) | P | Measure (95% CI) | P |
| Total | Expsorure00 | Ref |  | Ref |  |
|  | Expsorure01 | 3.91 (1.64-9.28) | 0.002 | 3.35 (1.36-8.25) | 0.009 |
|  | Expsorure10 | 4.54 (1.67-12.31) | 0.003 | 3.83 (1.36-10.82) | 0.011 |
|  | Expsorure11 | 4.95 (2.18-11.26) | <0.001 | 4.04 (1.71-9.60) | 0.002 |
|  | P trend | - | <0.001 | - | 0.006 |
| mMRC, <2 (n=11/126) | Expsorure00 | Ref |  | Ref |  |
|  | Expsorure01 | 0.61 (0.10-3.88) | 0.599 | 1.13 (0.07-19.12) | 0.932 |
|  | Expsorure10 | 0.79 (0.08-8.37) | 0.848 | 0.00 (0.00-Inf) | 0.996 |
|  | Expsorure11 | 1.40 (0.31-6.31) | 0.678 | 5.20 (0.50-54.56) | 0.170 |
|  | P trend | - | 0.530 | - | 0.504 |
| mMRC, ≥2 (n=106/383) | Expsorure00 | Ref |  | Ref |  |
|  | Expsorure01 | 6.20 (2.06-18.63) | 0.001 | 5.73 (1.84-17.83) | 0.003 |
|  | Expsorure10 | 7.43 (2.17-25.46) | 0.001 | 6.59 (1.86-23.35) | 0.004 |
|  | Expsorure11 | 6.68 (2.32-19.26) | <0.001 | 6.33 (2.11-19.03) | 0.001 |
|  | P trend | - | 0.003 | - | 0.007 |
| CAT, ≤20 (n=26/174) | Expsorure00 | Ref |  | Ref |  |
|  | Expsorure01 | 1.25 (0.31-5.00) | 0.752 | 0.72 (0.16-3.33) | 0.673 |
|  | Expsorure10 | 3.57 (0.84-15.21) | 0.085 | 1.69 (0.32-9.00) | 0.537 |
|  | Expsorure11 | 2.22 (0.67-7.40) | 0.195 | 1.30 (0.34-4.95) | 0.712 |
|  | P trend | - | 0.122 | - | 0.435 |
| CAT, >20 (n=91/335) | Expsorure00 | Ref |  | Ref |  |
|  | Expsorure01 | 6.86 (1.96-23.95) | 0.003 | 6.76 (1.88-24.29) | 0.003 |
|  | Expsorure10 | 5.82 (1.41-24.06) | 0.015 | 5.75 (1.35-24.46) | 0.018 |
|  | Expsorure11 | 7.64 (2.27-25.66) | 0.001 | 7.55 (2.17-26.33) | 0.002 |
|  |  | P trend | 0.004 | - | 0.009 |
| COPD course, <10 years (n=51/306) | Expsorure00 | Ref |  | Ref |  |
|  | Expsorure01 | 3.19 (1.10-9.31) | 0.033 | 2.64 (0.88-7.93) | 0.083 |
|  | Expsorure10 | 2.20 (0.59-8.17) | 0.239 | 1.82 (0.48-6.91) | 0.381 |
|  | Expsorure11 | 3.54 (1.29-9.68) | 0.014 | 2.83 (1.00-8.05) | 0.050 |
|  | P trend | - | 0.034 | - | 0.117 |
| COPD course, ≥10 years (n=66/203) | Expsorure00 | Ref |  | Ref |  |
|  | Expsorure01 | 4.56 (0.96-21.56) | 0.056 | 6.01 (1.18-30.58) | 0.031 |
|  | Expsorure10 | 14.67 (2.44-88.09) | 0.003 | 13.48 (2.07-87.92) | 0.007 |
|  | Expsorure11 | 6.31 (1.41-28.26) | 0.016 | 8.13 (1.67-39.52) | 0.009 |
|  | P trend | - | 0.021 | - | 0.019 |
| Pneumonia, No (n=23/111) | Expsorure00 | Ref |  | Ref |  |
|  | Expsorure01 | 1.02 (0.28-3.79) | 0.974 | 0.96 (0.24-3.92) | 0.959 |
|  | Expsorure10 | 1.97 (0.37-10.40) | 0.424 | 1.67 (0.28-9.88) | 0.573 |
|  | Expsorure11 | 1.34 (0.39-4.52) | 0.655 | 0.87 (0.23-3.35) | 0.852 |
|  | P trend | - | 0.543 | - | 0.895 |
| Pneumonia, Yes (n=94/398) | Expsorure00 | Ref |  | Ref |  |
|  | Expsorure01 | 11.12 (2.54-48.64) | 0.001 | 10.15 (2.22-46.37) | 0.003 |
|  | Expsorure10 | 11.21 (2.31-54.41) | 0.003 | 11.01 (2.15-56.29) | 0.004 |
|  | Expsorure11 | 13.58 (3.21-57.40) | <0.001 | 12.84 (2.90-56.91) | 0.001 |
|  | P trend | - | <0.001 | - | 0.001 |
| Treat with Glucocorticoid, No (n=44/246) | Expsorure00 | Ref |  | Ref |  |
|  | Expsorure01 | 3.53 (0.92-13.59) | 0.066 | 2.84 (0.70-11.59) | 0.145 |
|  | Expsorure10 | 3.84 (0.85-17.43) | 0.081 | 3.41 (0.70-16.55) | 0.128 |
|  | Expsorure11 | 6.04 (1.74-21.00) | 0.005 | 4.91 (1.35-17.88) | 0.016 |
|  | P trend | - | 0.003 | - | 0.011 |
| Treat with Glucocorticoid, Yes (n=73/263) | Expsorure00 | Ref |  | Ref |  |
|  | Expsorure01 | 3.63 (1.15-11.44) | 0.028 | 3.39 (1.02-11.23) | 0.046 |
|  | Expsorure10 | 5.38 (1.38-20.95) | 0.015 | 4.63 (1.13-19.02) | 0.033 |
|  | Expsorure11 | 3.83 (1.28-11.53) | 0.017 | 3.17 (0.98-10.27) | 0.054 |
|  | P trend | - | 0.061 | - | 0.210 |
| Treat with Antibiotic, No (n=5/70) | Expsorure00 | Ref |  | Ref |  |
|  | Expsorure01 | 1.13 (0.07-19.12) | 0.932 | 1.51 (0.08-27.63) | 0.780 |
|  | Expsorure10 | Insufficient Sample size | - | Insufficient Sample size | - |
|  | Expsorure11 | 5.20 (0.50-54.56) | 0.170 | 11.15 (0.61-202.38) | 0.103 |
|  | P trend | - | 0.116 | - | 0.084 |
| Treat with Antibiotic, Yes (n=112/439) | Expsorure00 | Ref |  | Ref |  |
|  | Expsorure01 | 4.00 (1.57-10.20) | 0.004 | 3.57 (1.35-9.47) | 0.010 |
|  | Expsorure10 | 3.84 (1.34-10.99) | 0.012 | 3.65 (1.22-10.94) | 0.021 |
|  | Expsorure11 | 4.27 (1.76-10.38) | 0.001 | 3.75 (1.48-9.53) | 0.006 |
|  | P trend | - | 0.009 | - | 0.033 |

CI: confidence intervals; Ref: reference; RERI: relative excess risk of interaction; AP: attributable proportion; SI: synergy index;

Expsorure00, ALB≥38.4 g/L & D-Dimer<83 ng/ml; Expsorure01, ALB≥38.4 g/L & D-Dimer≥83 ng/ml; Expsorure10, ALB<38.4 g/L & D-Dimer <83 ng/ml; Expsorure11, ALB <38.4 g/L & D-Dimer ≥83 ng/ml
Adjusted Model was adjusted Age, Sex, mMRC, FEV1/FVC, and COPD course.

Table S3 Test of model prediction effect

| Group | AUC | | NRI | | IDI | |
| --- | --- | --- | --- | --- | --- | --- |
| Model1 | Model2 | β (95%CI) | P | β (95%CI) | P |
| mMRC Model 1 vs. mMRC Model 2 | 0.625 (0.577-0.673) | 0.670 (0.620-0.721) | 0.22 (0.02, 0.43) | 0.031 | 0.016 (0.004, 0.027) | 0.006 |
| CAT Model 1 vs.  CAT Model 2 | 0.633 (0.578-0.688) | 0.661 (0.609-0.714) | 0.25 (0.05, 0.45) | 0.015 | 0.017 (0.006, 0.029) | 0.003 |
| FEV1/FVC Model 1 vs. FEV1/FVC Model 2 | 0.650 (0.592-0.708) | 0.681 (0.629-0.733) | 0.31 (0.11, 0.51) | 0.002 | 0.020 (0.006, 0.034) | 0.004 |

mMRC Model 1: only mMRC model;

mMRC Model 2: mMRC and ALB combined with D-Dimer model;

CAT Model 1: only CAT model;

CAT Model 2: CAT and ALB combined with D-Dimer model;

FEV1/FVC Model 1: only FEV1/FVC model;

FEV1/FVC Model 2: FEV1/FVC and ALB combined with D-Dimer model
